# Supplementary material for: Non-Oncological Neuroradiological Manifestations in NF1 and Their Clinical Implications
Source: MDPI journal article supplement (doi:10.3390/cancers13081831), 2021-04-12

## Supplementary Materials

**Figure S1.** PRISMA flow diagram of qualitative study selection process (range 1980 – at present).

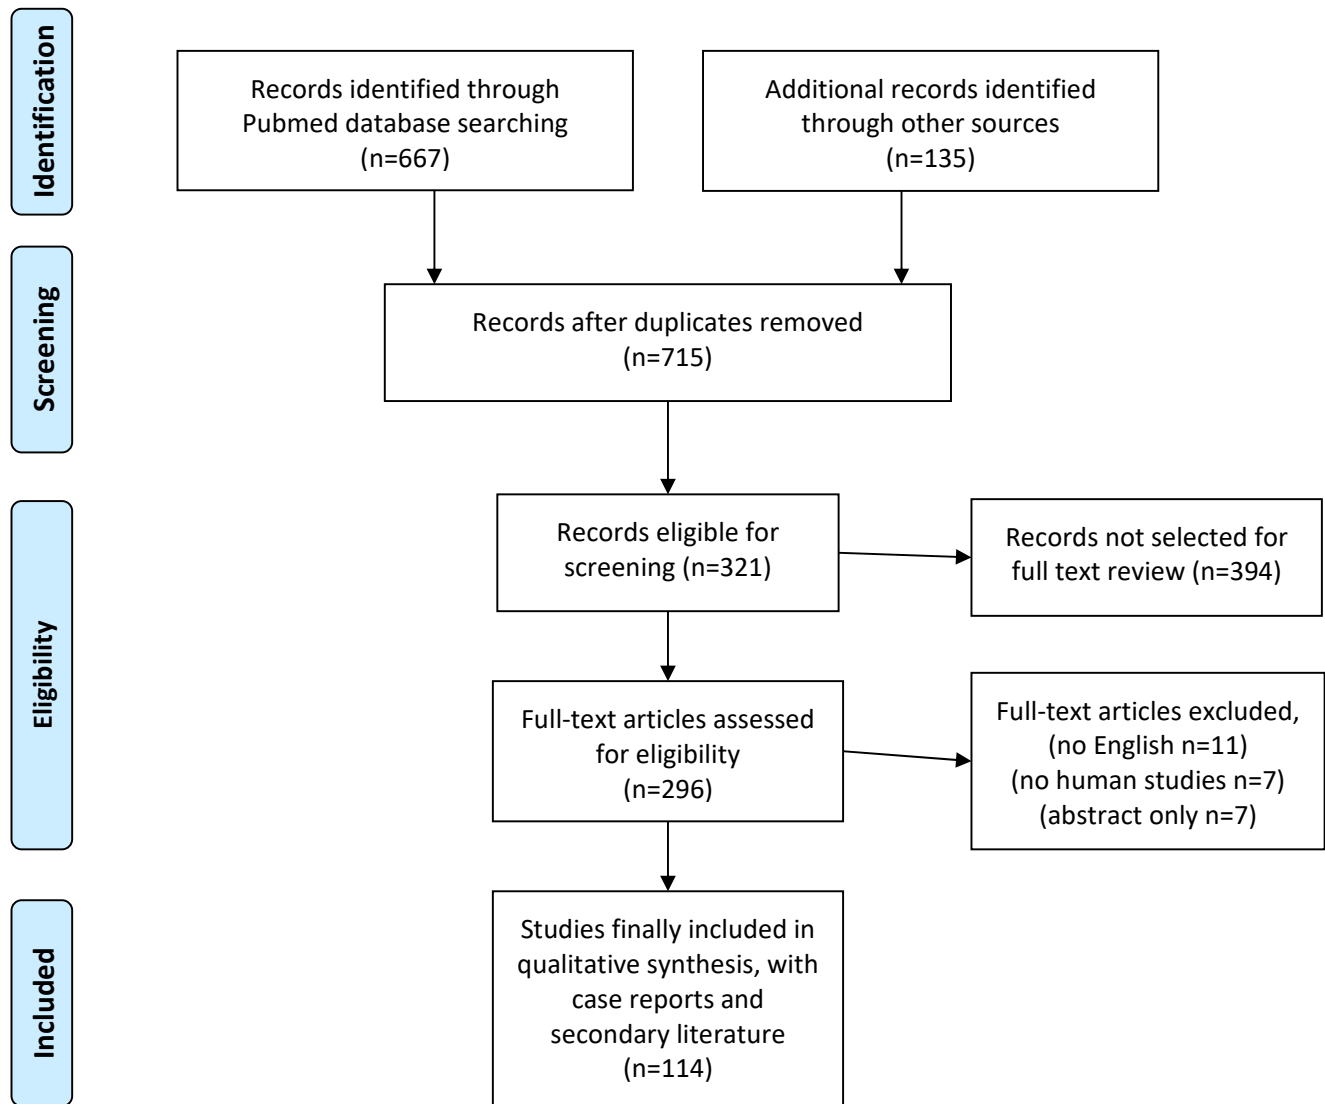

Supplement: s1 [file s1]
